# Supplementary material
Source: PubMed Central journal article supplement (PMC7927827)
Supplement: AAC.01487-20-s0001.pdf [file AAC.01487-20-s0001.pdf]

## **Supplemental Appendix**

|                                                                                                                                 |          |
|---------------------------------------------------------------------------------------------------------------------------------|----------|
| <b>Figure 1: Observed vs. predicted trough concentrations using previously studied model.....</b>                               | <b>2</b> |
| <b>Table 1: Performance of additional models tested. ....</b>                                                                   | <b>2</b> |
| <b>Figure 2: Observed vs. expected area under the curve distribution depending on volume of distribution used .....</b>         | <b>3</b> |
| <b>Appendix 1: Cross validation method.....</b>                                                                                 | <b>3</b> |
| <b>Table 2: Coefficients of previously studied model that was assessed for performance in the present study population.....</b> | <b>3</b> |
| <b>References .....</b>                                                                                                         | <b>4</b> |

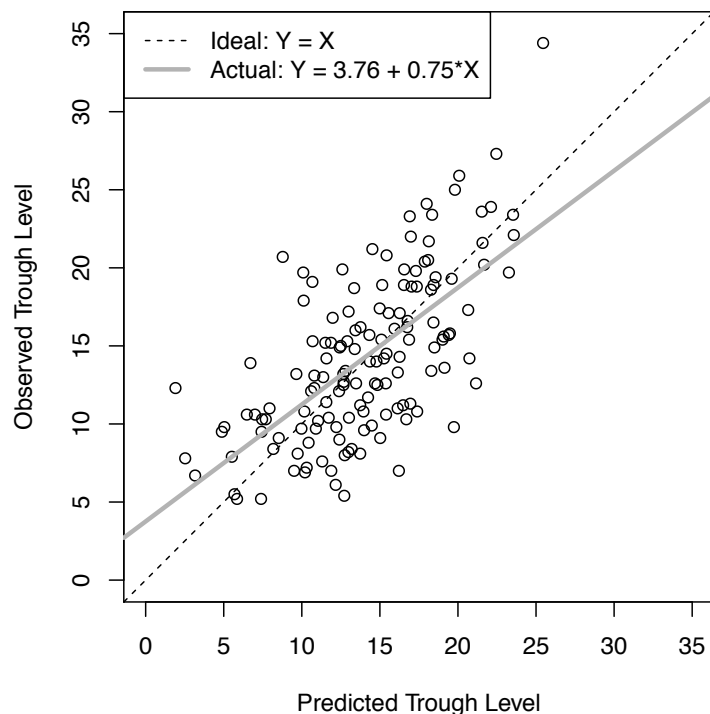

**Figure 1: Observed vs. predicted trough concentrations using previously studied model<sup>1</sup> in the 142 patients from the present population with a trough prior to the 4<sup>th</sup> dose.**

| <b>Model Number</b> | <b>R<sup>2</sup> as reported in Table 3</b> | <b>R<sup>2</sup> using total body weight instead of adjusted body weight</b> | <b>R<sup>2</sup> using total pre-trough dose instead of mg/kg dose and number of doses prior to level</b> |
|---------------------|---------------------------------------------|------------------------------------------------------------------------------|-----------------------------------------------------------------------------------------------------------|
| Model 1             | 0.16                                        | 0.14                                                                         | 0.14                                                                                                      |
| Model 2             | 0.48                                        | 0.45                                                                         | 0.42                                                                                                      |
| Model 3             | 0.48                                        | 0.45                                                                         | 0.42                                                                                                      |
| Model 4             | 0.09                                        | 0.04                                                                         | 0.09                                                                                                      |
| Model 5             | 0.12                                        | 0.09                                                                         | 0.15                                                                                                      |
| Model 6             | 0.36                                        | 0.31                                                                         | 0.39                                                                                                      |
| Model 7             | 0.31                                        | 0.27                                                                         | 0.34                                                                                                      |
| Model 8             | 0.44                                        | 0.44                                                                         | 0.44                                                                                                      |
| Model 9             | 0.49                                        | 0.46                                                                         | 0.49                                                                                                      |

**Table 1: Performance of additional models tested.**

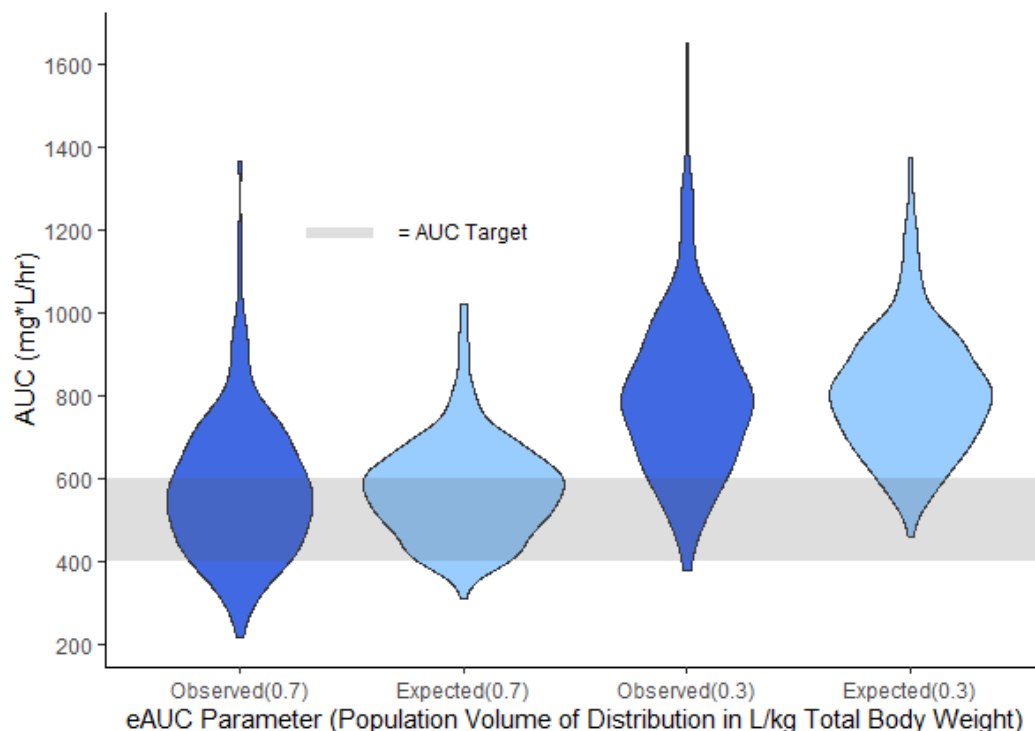

**Figure 2: Observed vs. expected area under the curve distribution depending on volume of distribution used (N=200).**

Cross-validation was performed on the optimal model for trough level prediction to address potential over-fitting. The final model was re-derived by using 90% of the sample (n = 180) and validated by determining the R<sup>2</sup> in the remaining 10% (n = 20). This cross-validation was repeated 10 times to determine the mean R<sup>2</sup> across the 10 replications.

**Appendix 1: Cross validation method.**

| Parameter                | Beta  |
|--------------------------|-------|
| Intercept                | 16.7  |
| Vancomycin total dose, g | 2.95  |
| Every 8-hour interval    | 4.84  |
| Every 12-hour interval   | REF   |
| Every 24-hour interval   | -7.70 |

**Table 2: Coefficients of previously studied model<sup>1</sup> that was assessed for performance in the present study population.**

## References

1. Frazee EN, Rule AD, Herrmann SM, Kashani KB, Leung N, Virk A, Voskoboev N, Lieske JC. 2014. Serum cystatin C predicts vancomycin trough levels better than serum creatinine in hospitalized patients: A cohort study. *Crit Care* 18:1–10.
